# Supplementary material for: β-Vesignieite BaCu3V2O8(OH)2: a structurally perfect S = 1/2 kagomé antiferromagnet
Source: Royal Society of Chemistry journal article supplement (doi:10.1039/c2jm32250a), 2012-01-01
Supplement: c2jm32250a.pdf [file c2jm32250a.pdf]

## Electronic Supplementary Information

### ***β*-Vesignieite BaCu<sub>3</sub>V<sub>2</sub>O<sub>8</sub>(OH)<sub>2</sub>: A Structurally Perfect S = 1/2 Kagomé Antiferromagnet**

Hiroyuki Yoshida<sup>†\*</sup>, Yuichi Michiue<sup>†</sup>, Eiji Takayama-Muromachi<sup>†</sup>, and Masaaki Isobe<sup>†</sup>

<sup>†</sup>National Institute for Materials Science, 1-1 Namiki, Tsukuba-shi, Ibaraki 305-0044, Japan

Please address all correspondence to

\*Hiroyuki Yoshida

Strongly Correlated Materials Group, National Institute for Materials Science

1-1 Namiki, Tsukuba, Ibaraki, 305-0044, Japan

Phone : +81-29-851-3354 (ex. 8884) E-mail : YOSHIDA.Hiroyuki@nims.go.jp

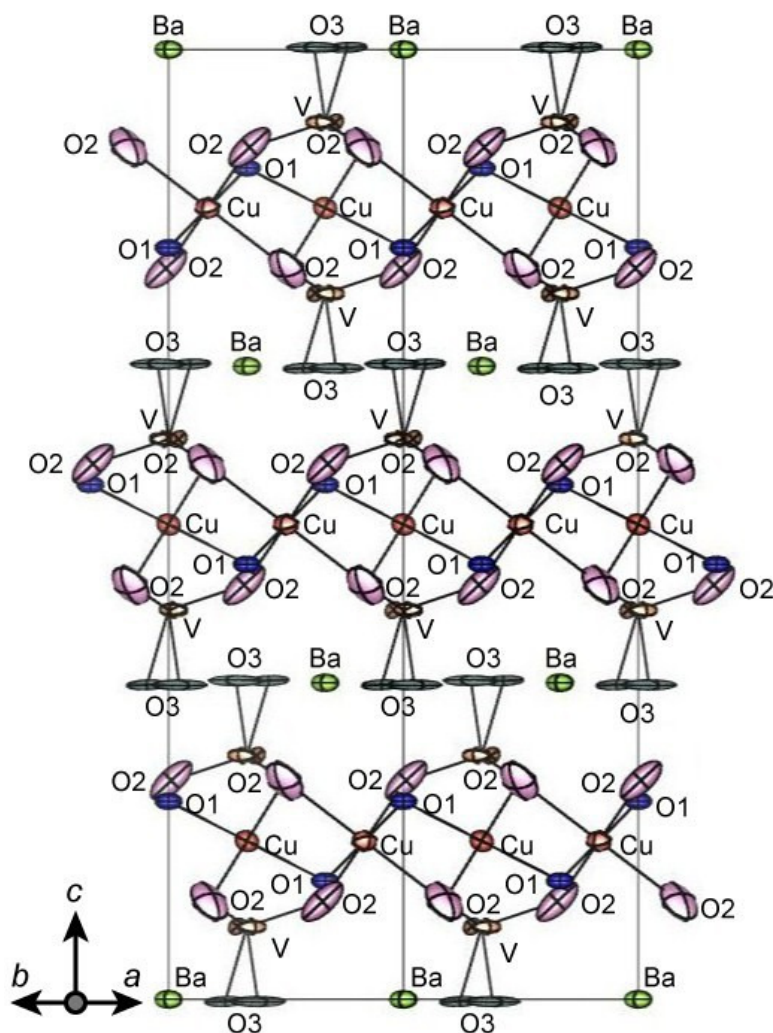

Figure S1. Crystal structure of  $\beta$ -vesignieite,  $\text{BaCu}_3\text{V}_2\text{O}_8(\text{OH})_2$  with thermal ellipsoids at 80% for legibility. The hydrogen atoms are not shown.

Table S1. Details of X-ray diffraction data collection and refinement results of  $\beta$ -vesignieite.

|                                                       |                                                                   |
|-------------------------------------------------------|-------------------------------------------------------------------|
| compound                                              | BaCu <sub>3</sub> V <sub>2</sub> O <sub>8</sub> (OH) <sub>2</sub> |
| color/shape                                           | lightgreen/hexagonal plate                                        |
| formula weight (g mol <sup>-1</sup> )                 | 591.9                                                             |
| space group                                           | <i>R</i> -3 <i>m</i>                                              |
| Temperature (K)                                       | 293                                                               |
| <i>a</i>                                              | 5.9295(10)                                                        |
| <i>b</i>                                              | 5.9295(10)                                                        |
| <i>c</i>                                              | 20.790(4)                                                         |
| volume                                                | 633.0(2)                                                          |
| <i>Z</i>                                              | 3                                                                 |
| density(calc.) (g m <sup>-3</sup> )                   | 4.6562                                                            |
| absorption coefficient (mm <sup>-1</sup> )            | 14.178                                                            |
| radiation                                             | Mo K $\alpha$ (0.71069 Å)                                         |
| crystal dimension(mm)                                 | 0.06(diagonal)×0.02                                               |
| reflections collected                                 | 2806                                                              |
| independent reflections                               | 535                                                               |
| reflections with <i>I</i> > 2sigma                    | 424                                                               |
| range of <i>h,k,l</i>                                 | <i>h</i> :−10/9, <i>k</i> :0/10, <i>l</i> :−37/37                 |
| F(000)                                                | 813                                                               |
| goodness of fit                                       | 1.69                                                              |
| <i>R</i> <sub>obs</sub> ( <i>F</i> )                  | 0.0217                                                            |
| <i>wR</i> <sub>all</sub> ( <i>F</i> <sup>2</sup> )    | 0.0337                                                            |
| <i>Dr</i> (max)/ <i>Dr</i> (min) (e Å <sup>-3</sup> ) | 2.05/−1.36                                                        |

Table S2. Structural parameter of both  $\alpha$ - (ref. 11) and  $\beta$ -vesignieite.

| atom                                   | site | <i>x</i>    | <i>y</i>   | <i>z</i>    | occupation | $U_{\text{iso}}$ (Å <sup>2</sup> ) |
|----------------------------------------|------|-------------|------------|-------------|------------|------------------------------------|
| <i><math>\alpha</math>-vesignieite</i> |      |             |            |             |            |                                    |
| Ba                                     | 2c   | 0           | 0          | 0.5         | 1          | 1                                  |
| Cu1                                    | 2a   | 0.5         | 0.5        | 0           | 1          | 1                                  |
| Cu2                                    | 4e   | 0.25        | 0.25       | 0           | 1          | 1                                  |
| V                                      | 4i   | 0.0898(3)   | 0.5        | 0.2697(4)   | 1          | 1                                  |
| O1                                     | 4i   | 0.2080(1)   | 0          | 0.1228(13)  | 1          | 1                                  |
| O2                                     | 8j   | 0.4822(10)  | 0.2411(16) | 0.1902(13)  | 1          | 1                                  |
| O3                                     | 4i   | 0.2245(13)  | 0.5        | 0.1913(19)  | 1          | 1                                  |
| O4                                     | 4i   | 0.3303(31)  | 0          | 0.4941(25)  | 1          | 1                                  |
| H                                      | 4i   | 0.289(26)   | 0          | 0.247(35)   | 1          | 1.61                               |
| <i><math>\beta</math>-vesignieite</i>  |      |             |            |             |            |                                    |
| Ba                                     | 3a   | 0           | 0          | 0           | 1          | 0.01441(10)                        |
| Cu                                     | 9d   | 0.333333    | 0.166667   | 0.166667    | 1          | 0.01258(13)                        |
| V                                      | 18h  | 0.35408(18) | 0.7082(4)  | 0.07675(5)  | 0.3333     | 0.0116(5)                          |
| O1                                     | 6c   | 0.666667    | 0.333333   | 0.12530(15) | 1          | 0.0126(7)                          |
| O2                                     | 18h  | 0.1726(2)   | 0.8274(2)  | 0.10348(12) | 1          | 0.0366(9)                          |
| O3                                     | 18h  | 0.6206(7)   | 0.3794(7)  | 0.0025(3)   | 0.3333     | 0.040(3)                           |
| H                                      | 18h  | 0.65(5)     | 0.33(3)    | 0.091(3)    | 0.3333     | 0.01                               |

Table S3. Anisotropic atomic displacement parameter  $U_{ij}$  ( $\text{\AA}^2$ ) of both  $\alpha$ - (ref. 11) and  $\beta$ -vesignieite.

| atom                                   | $U_{11}$    | $U_{22}$    | $U_{33}$    | $U_{12}$    | $U_{13}$     | $U_{23}$    |
|----------------------------------------|-------------|-------------|-------------|-------------|--------------|-------------|
| <i><math>\alpha</math>-vesignieite</i> |             |             |             |             |              |             |
| Ba                                     | 0.0041(1)   | 0.0010(2)   | 0.0041(2)   | 0           | 0.0018(1)    | 0           |
| Cu1                                    | 0.0032(2)   | 0.0086(6)   | 0.0051(4)   | 0           | 0.0020(2)    | 0           |
| Cu2                                    | 0.0035(2)   | 0.0068(6)   | 0.0046(3)   | -0.0005(2)  | 0.0016(2)    | -0.0004(3)  |
| V                                      | 0.0088(4)   | 0.0242(9)   | 0.0038(4)   | 0           | 0.0014(3)    | 0           |
| O1                                     | 0.0038(9)   | 0.0099(23)  | 0.0048(14)  | 0           | 0.0021(10)   | 0           |
| O2                                     | 0.0104(11)  | 0.0164(24)  | 0.0182(19)  | -0.0039(14) | 0.0102(13)   | -0.0085(18) |
| O3                                     | 0.0053(12)  | 0.0174(37)  | 0.0160(28)  | 0           | -0.0002(5)   | 0           |
| O4                                     | 0.0336(16)  | 0.0916(50)  | 0.0074(13)  | 0           | 0.0036(10)   | 0           |
| <i><math>\beta</math>-vesignieite</i>  |             |             |             |             |              |             |
| Ba                                     | 0.01802(13) | 0.01802(13) | 0.00719(14) | 0.00901(6)  | 0            | 0           |
| Cu                                     | 0.01196(19) | 0.01467(16) | 0.01022(18) | 0.00598(10) | -0.00145(13) | -0.00073(7) |
| V                                      | 0.0183(7)   | 0.0060(8)   | 0.0065(3)   | 0.0030(4)   | -0.00050(16) | -0.0010(3)  |
| O1                                     | 0.0160(8)   | 0.0160(8)   | 0.0057(10)  | 0.0080(4)   | 0            | 0           |
| O2                                     | 0.0331(9)   | 0.0331(9)   | 0.0381(13)  | 0.0124(11)  | -0.0137(6)   | 0.0137(6)   |
| O3                                     | 0.068(4)    | 0.068(4)    | 0.0062(18)  | 0.050(4)    | -0.0004(11)  | 0.0004(11)  |

Table S4. Selected bond lengths (Å) and angles (deg.) of both  $\alpha$ - (ref. 11) and  $\beta$ -vesignieite.

| bond length (Å)                        |                              | bond angle (deg.) |            |
|----------------------------------------|------------------------------|-------------------|------------|
| <i><math>\alpha</math>-vesignieite</i> |                              |                   |            |
| Cu1-Cu2                                | 2.9624(5)                    | Cu1-O1-Cu2        | 101.8(3)   |
| Cu2-Cu2                                | 2.9555(5)                    | Cu2-O1-Cu2        | 101.72(14) |
| Cu1-O1, O2                             | 1.9131(9), 2.183(8)          |                   |            |
| Cu2-O1, O2, O3                         | 1.905(2), 2.174(6), 2.185(6) |                   |            |
| <i><math>\beta</math>-vesignieite</i>  |                              |                   |            |
| Cu-Cu                                  | 2.9648(5)                    | Cu-O1-Cu          | 101.40(12) |
| Cu-O1                                  | 1.9156(16)                   | Cu-O2-Cu          | 85.56(9)   |
| Cu-O2                                  | 2.182(2)                     |                   |            |
